# Supplementary material for: Silicene growth through island migration and coalescence
Source: Royal Society of Chemistry journal article supplement (doi:10.1039/c7nr03153j), 2017-01-01
Supplement: c7nr03153j4.pdf [file c7nr03153j4.pdf]

## Supporting information

### Silicene growth through island migration and coalescence

Mathew J. Cherukara<sup>1,1,†</sup>, Badri Narayanan<sup>2,†</sup>, Henry Chan<sup>3</sup>, Subramanian K.R.S. Sankaranarayanan<sup>3,4\*</sup>

<sup>1</sup>X-ray Science Division, Argonne National Laboratory, Argonne, IL, 60439

<sup>2</sup>Materials Science Division, Argonne National Laboratory, Argonne, IL, 60439

<sup>3</sup>Center for Nanoscale Materials, Argonne National Laboratory, Argonne, IL, 60439

<sup>4</sup>Computation Institute, University of Chicago

---

<sup>1</sup> Corresponding authors: [ssankaranarayanan@anl.gov](mailto:ssankaranarayanan@anl.gov), [mcherukara@aps.anl.gov](mailto:mcherukara@aps.anl.gov)

<sup>†</sup> These authors contributed equally to the work

Supporting movie 1: Nucleation and growth of silicene monolayers on Ir (111) at 300 K with a deposition rate of 1000 atoms/ns.

Supporting movie 2: Nucleation and growth of silicene monolayers on Ir (111) at 500 K with a deposition rate of 1000 atoms/ns.

Supporting movie 3: Nucleation and growth of silicene monolayers on Ir (111) at 700 K with a deposition rate of 1000 atoms/ns.
